# Supplementary material
Source: JCI journal article supplement (doi:10.1172/jci187904)
Supplement: sd3 [file 3]

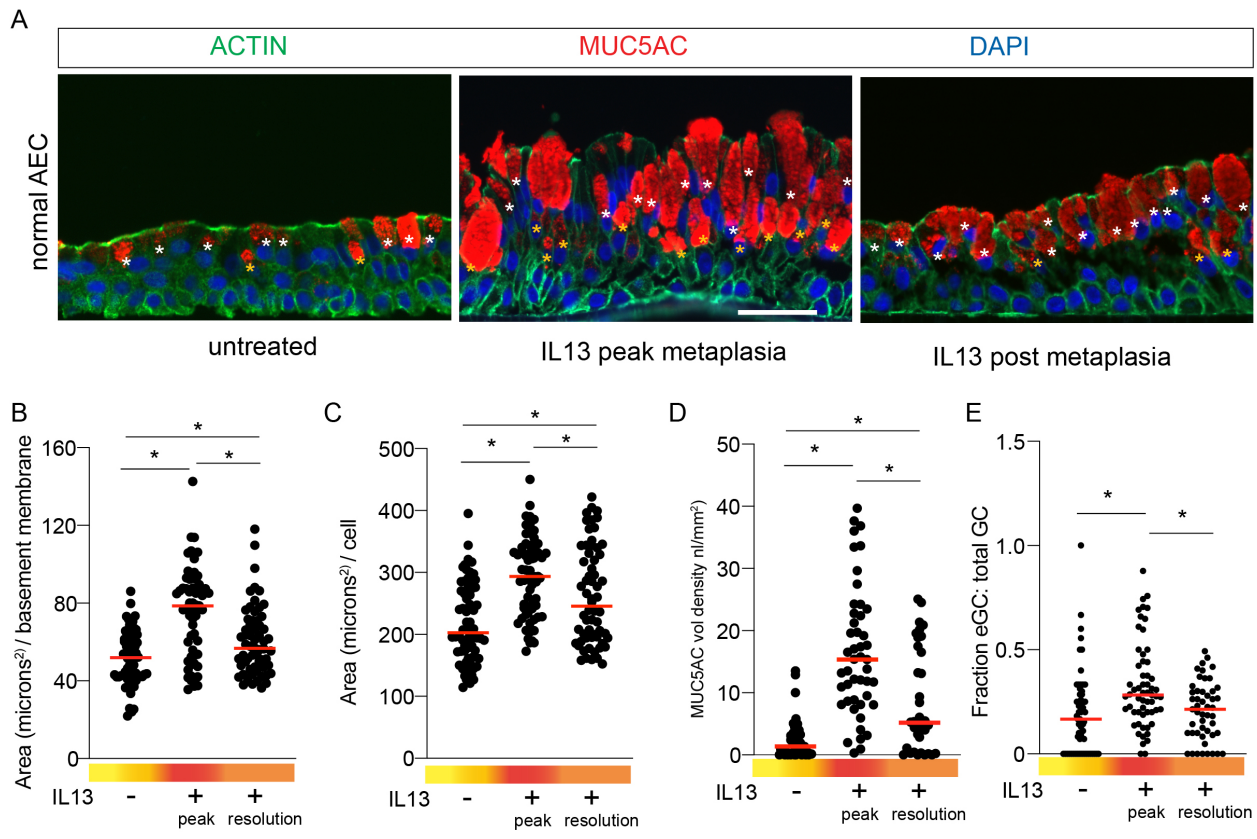

Supplemental Figure 1

A

|                      |   |      |   |
|----------------------|---|------|---|
| Collection timepoint | ● | IL13 | ↑ |
| Rap or Vehicle       | X | X    | X |
| IL13 Day             | 1 | 3    | 5 |
|                      |   |      | 8 |
|                      | ↑ | ↑    | ↑ |

B

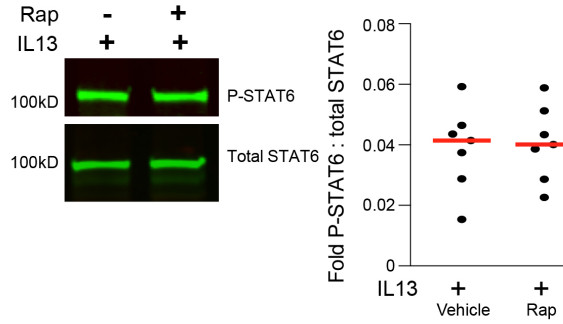

C

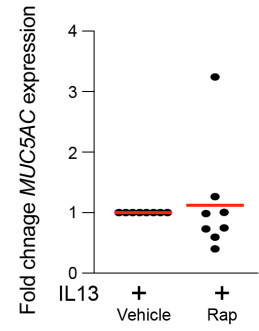

D

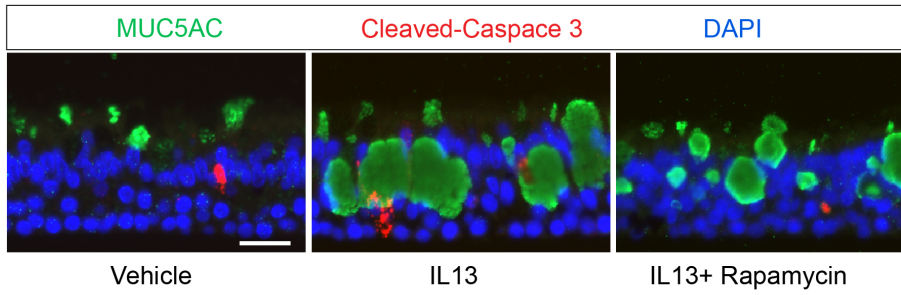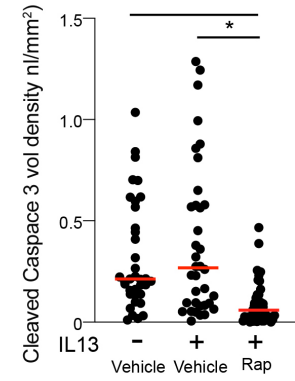

E

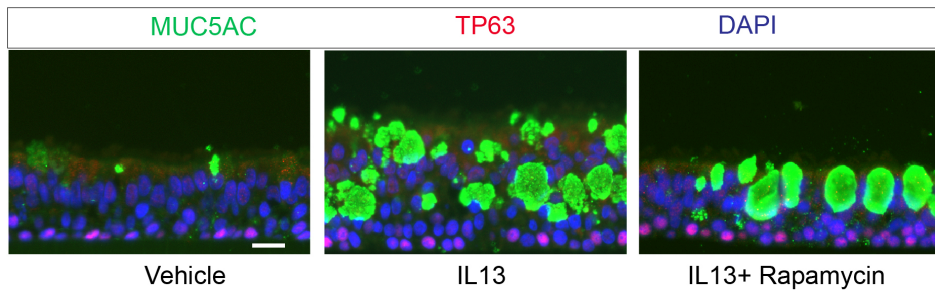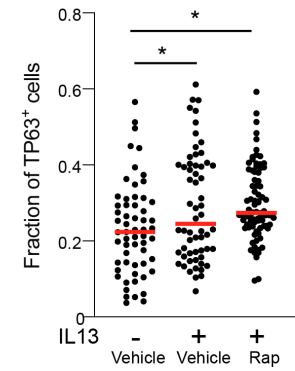

Supplemental Figure 2

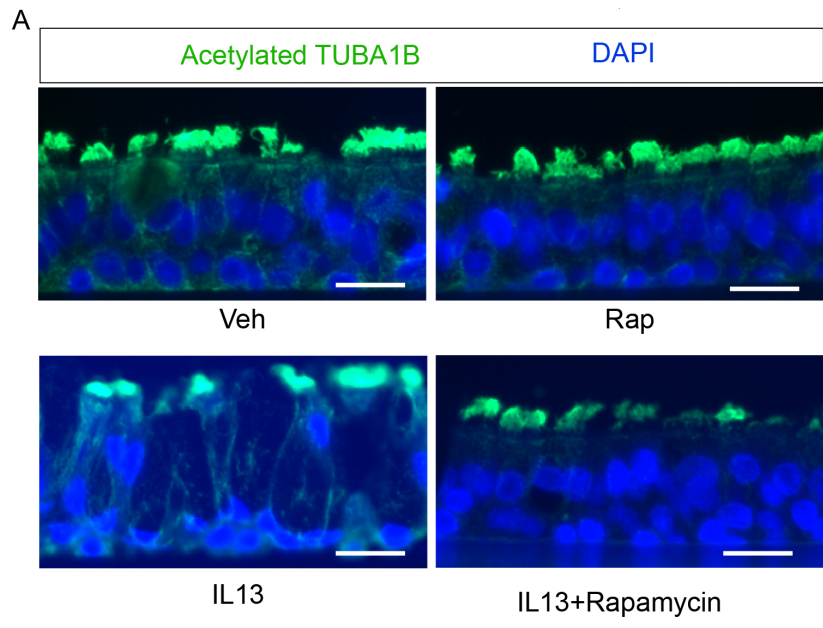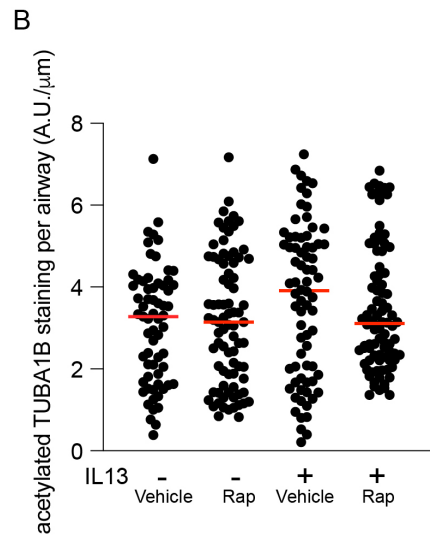

Supplemental Figure 3

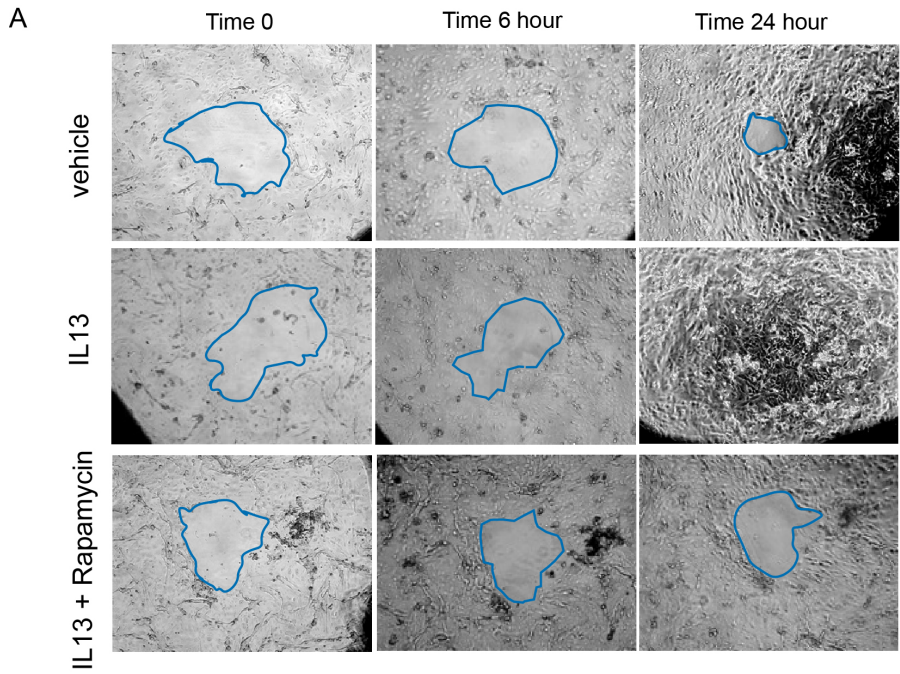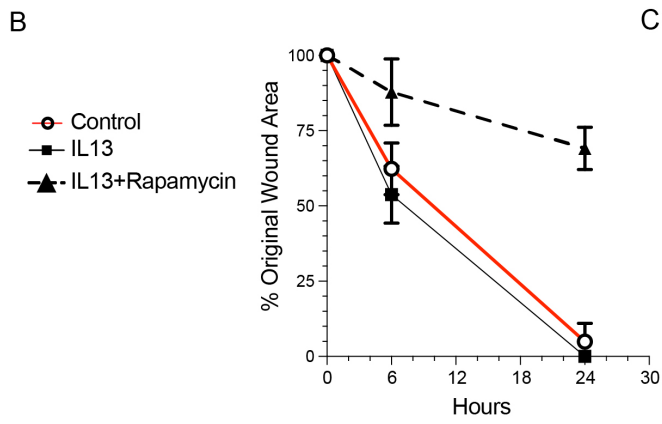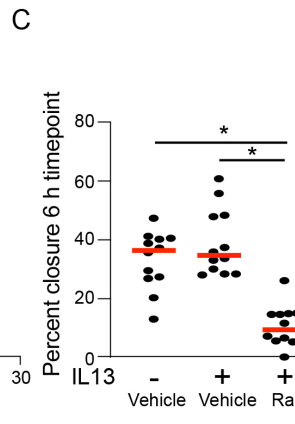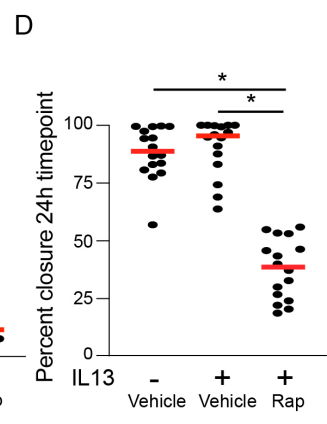

Supplemental Figure 4
