# Supplementary material
Source: JCI journal article supplement (doi:10.1172/jci187904)
Supplement: sd4 [file 4]

# Figure 3 total mTOR blots

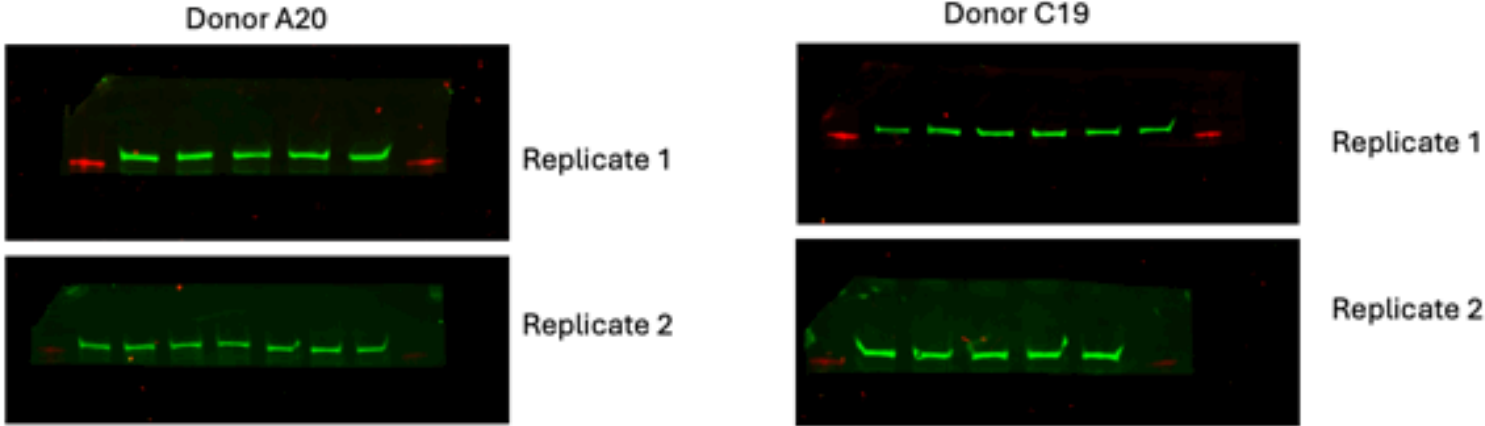

# Figure 3 total mTOR blots continued

Donor B19

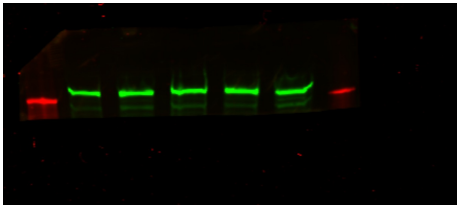

Replicate 1

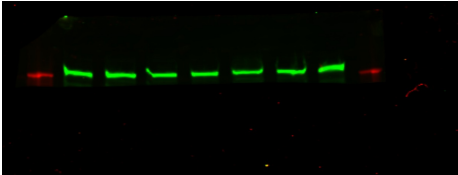

Replicate 2

Donor I-23

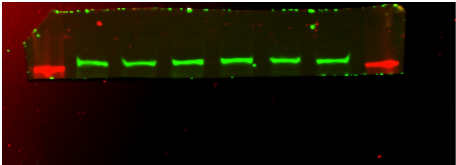

Replicates 1 and 2

# Figure 3 Phospho RPS6 blots

A20 donor

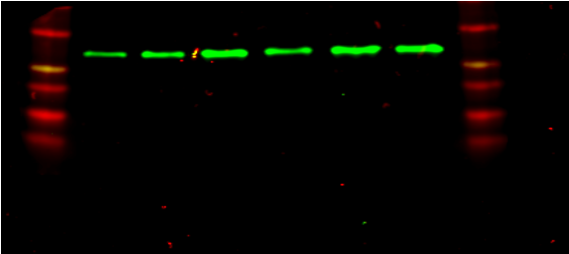

1<sup>st</sup> replicate

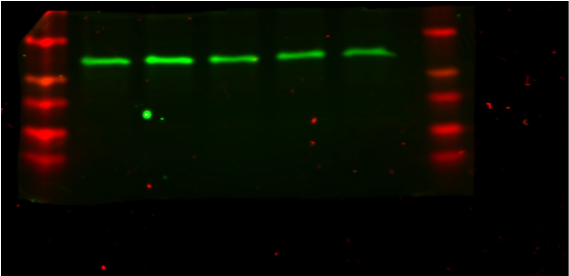

2nd replicate

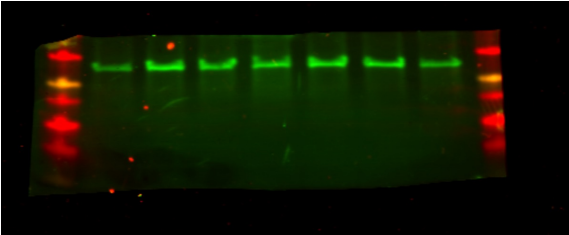

3rd replicate

B19 donor

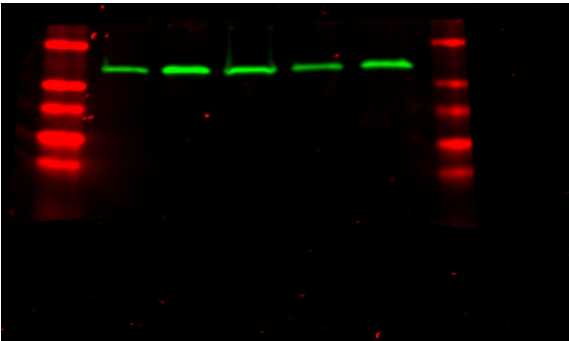

1<sup>st</sup> replicate

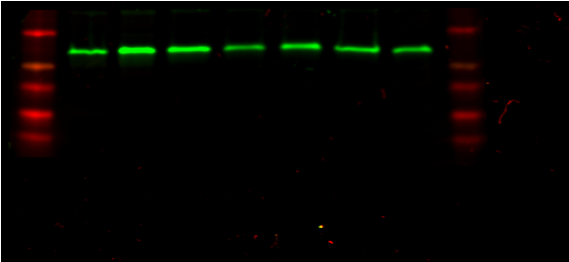

2nd replicate

# Figure 3 Total RPS6 blots

A20 donor

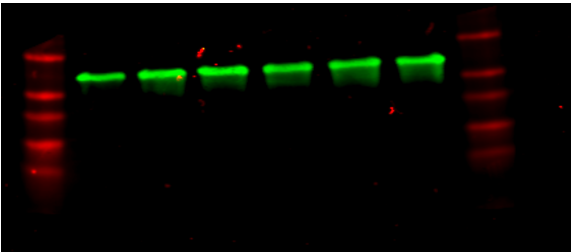

1<sup>st</sup> replicate

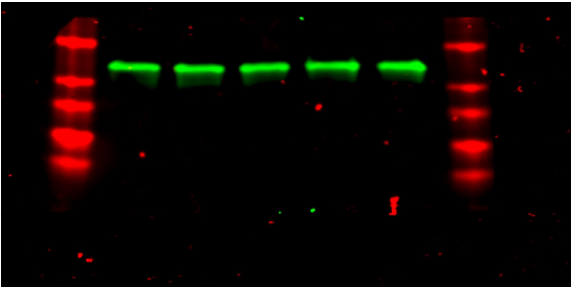

2nd replicate

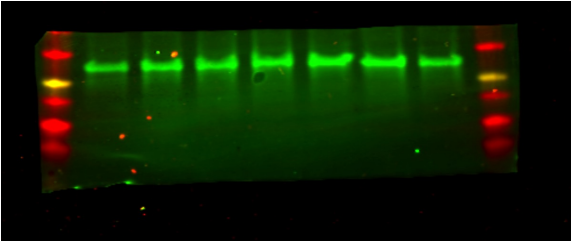

3rd replicate

B19 donor

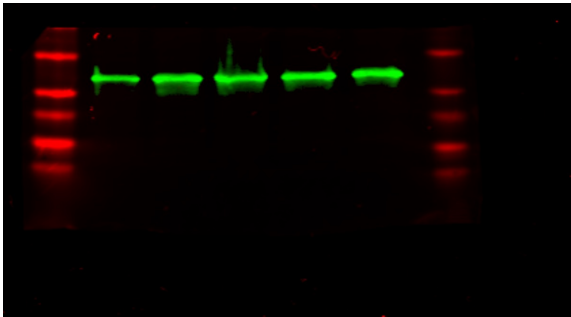

1<sup>st</sup> replicate

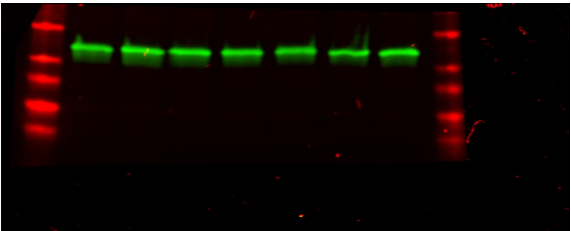

2nd replicate

# Figure 3 Phospho RPS6 blots

C19 donor

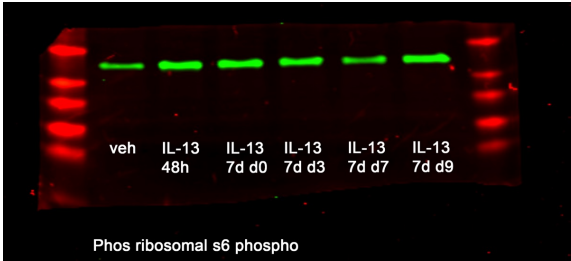

1<sup>st</sup> replicate

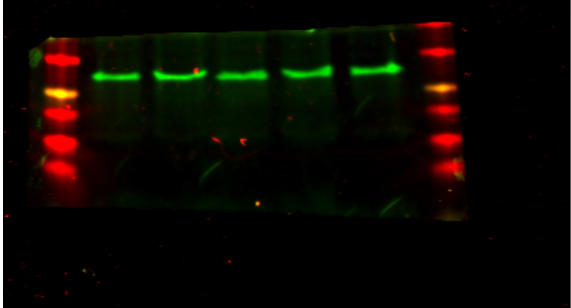

2nd replicate

I23 donor

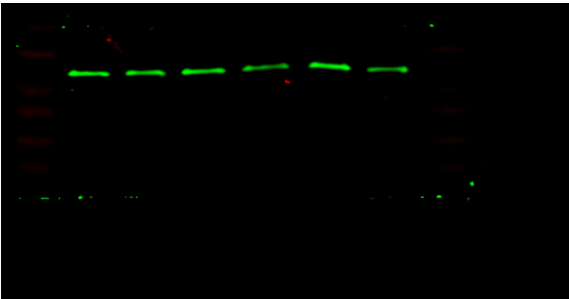

1<sup>st</sup> replicate

# Figure 3 total RPS6 blots

C19 donor

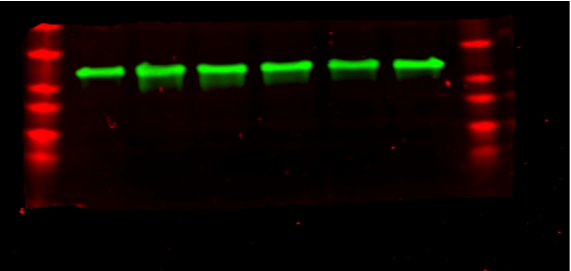

1<sup>st</sup> replicate

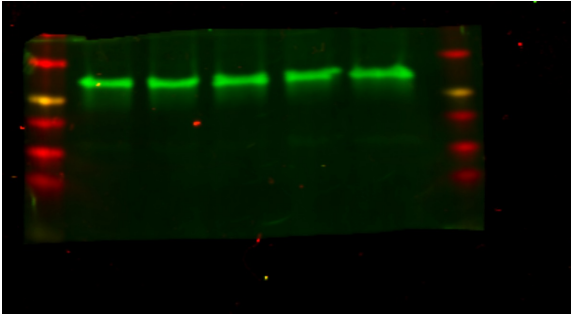

2nd replicate

I23 donor

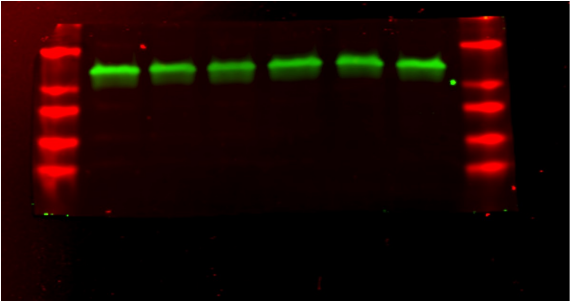

1<sup>st</sup> replicate

# Figure 3 Phospho and total P70S6 blots

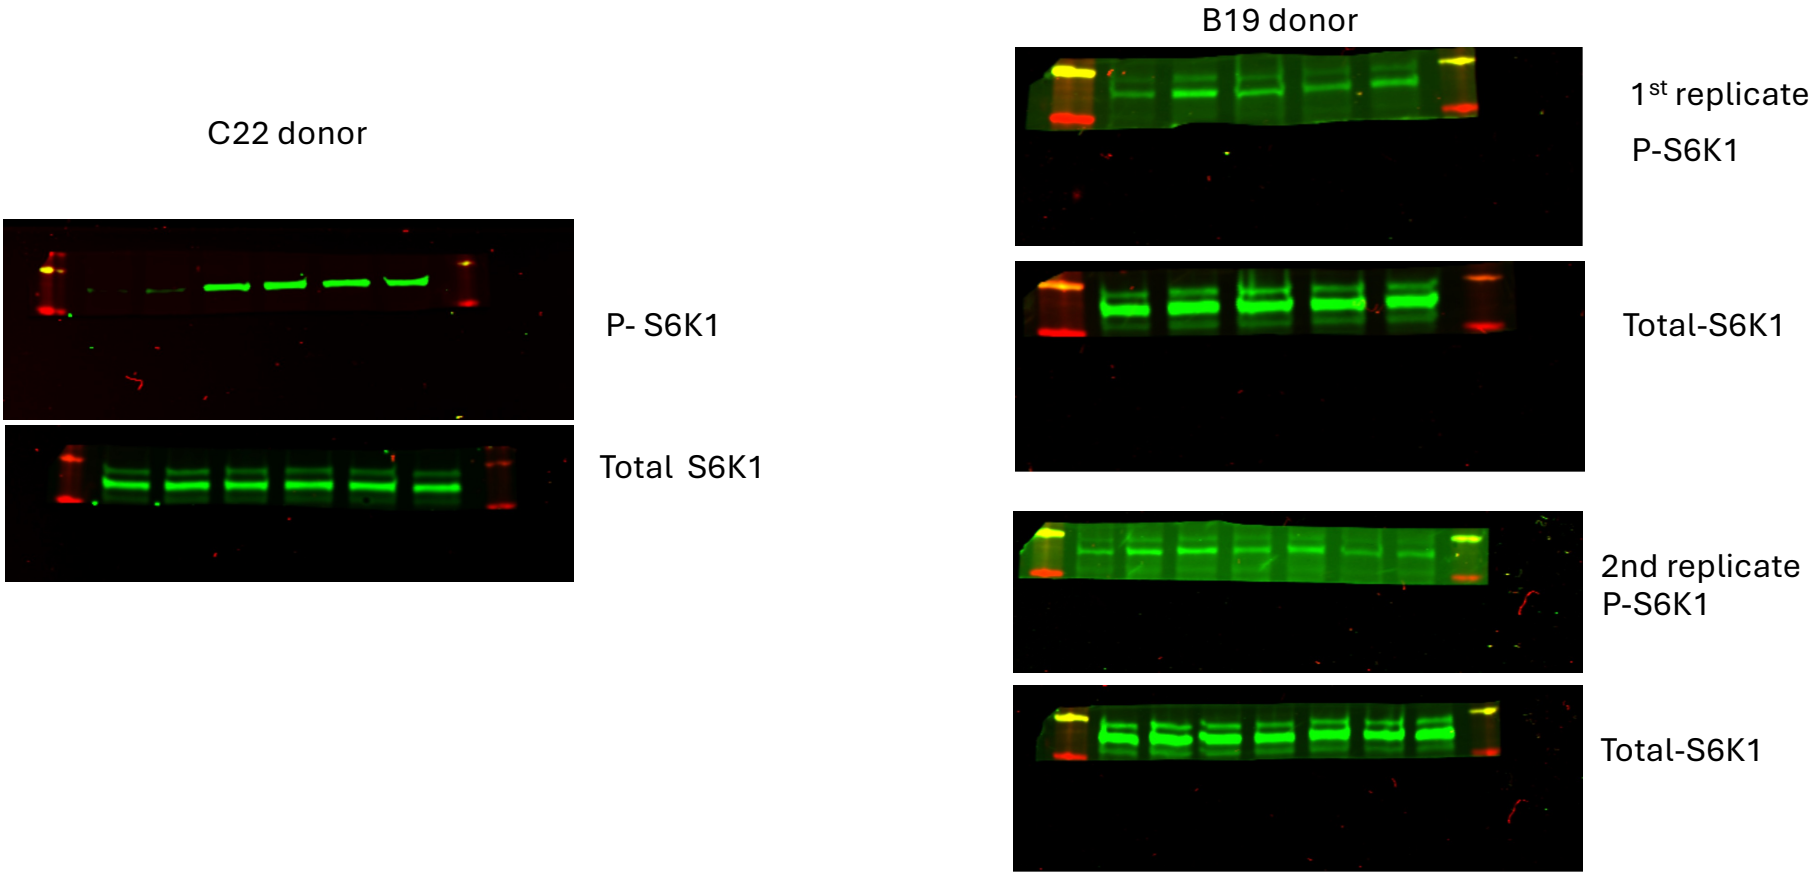

# Figure 3 Phospho and total S6K1 blots

C19 donor

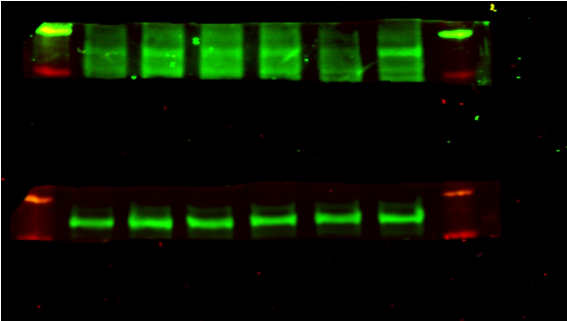

1<sup>st</sup> replicate  
P-S6K1

1<sup>st</sup> replicate  
Total S6K1

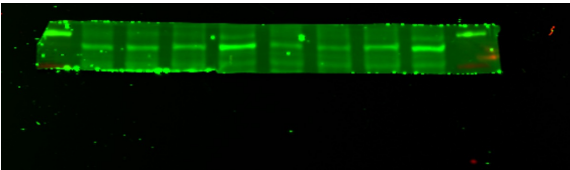

2<sup>nd</sup> replicate  
P-S6K1

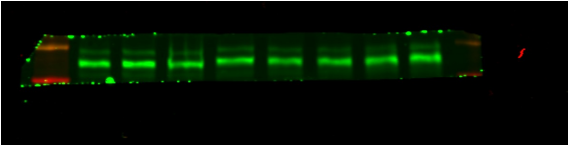

2<sup>nd</sup> replicate  
Total S6K1

# Figure 3 Phospho and total S6K1 blots

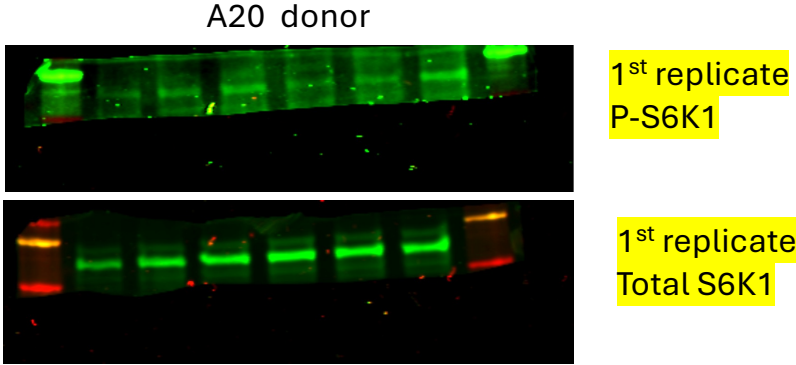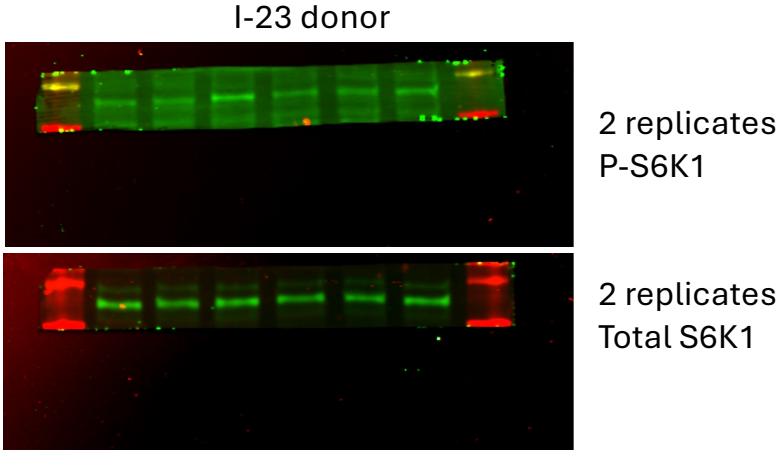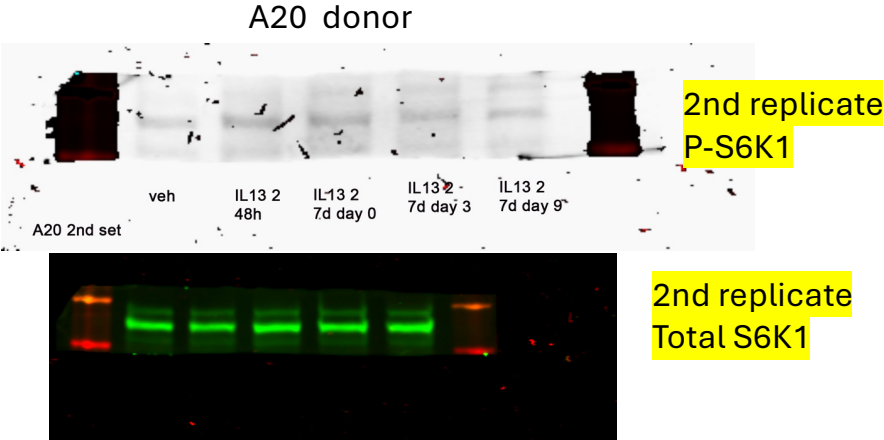

# Figure 3 Phospho ULK1 blots

C21 donor 2<sup>nd</sup> experiment

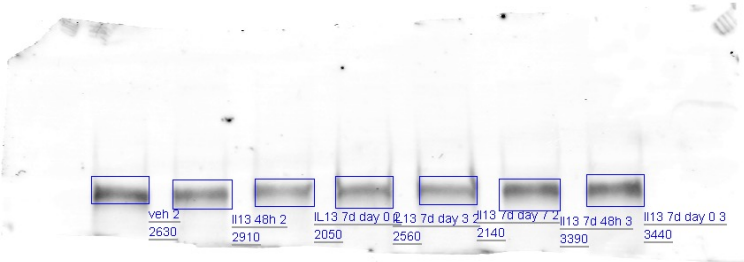

P- ULK1

Total ULK1

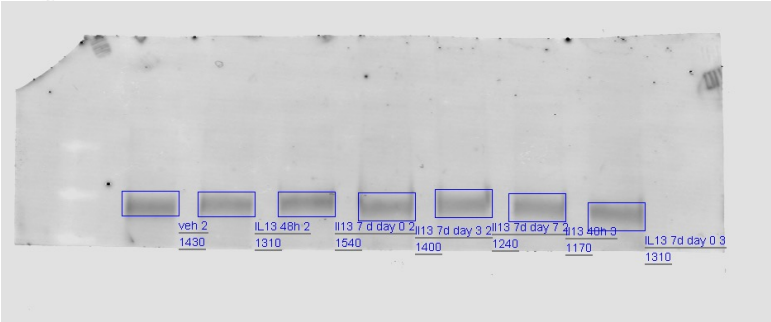

# Figure 3 Phospho and total ULK1 blots

C21 donor 1<sup>st</sup> experiment

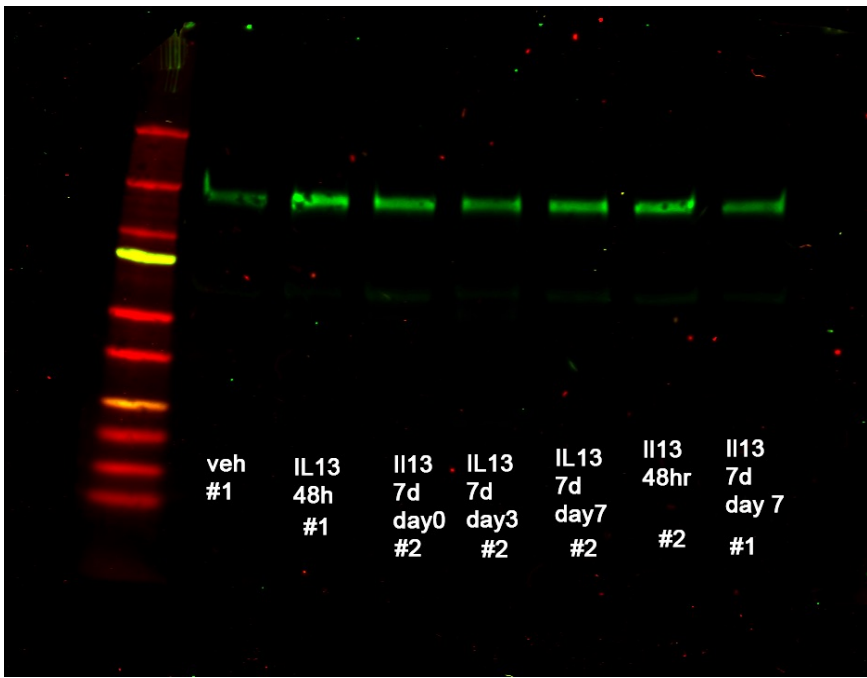

1<sup>st</sup> and 2<sup>nd</sup> replicates P-ULK1

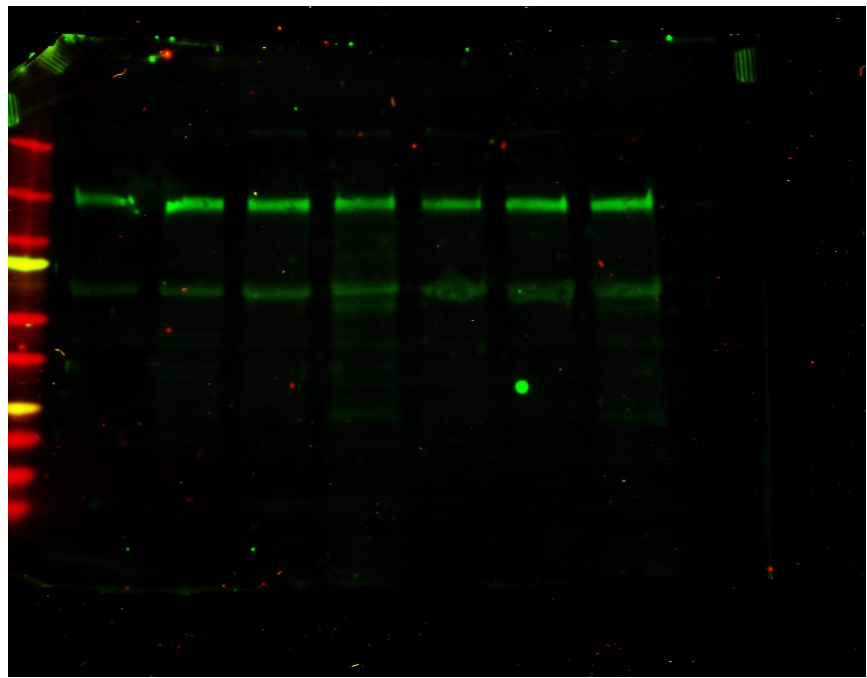

1<sup>st</sup> and 2<sup>nd</sup> replicates total ULK1

# Figure 3 Phospho ULK1 blots

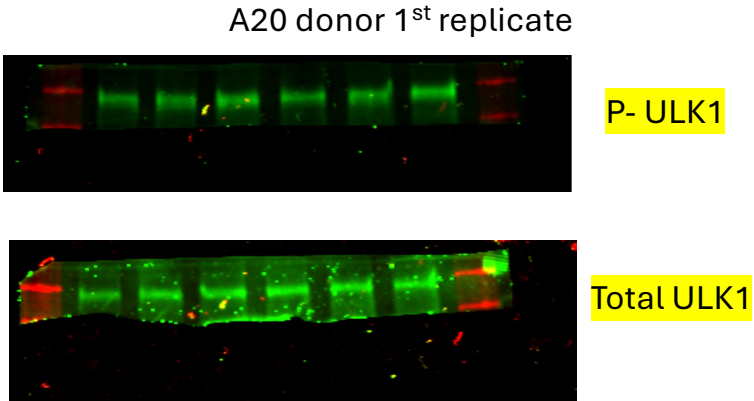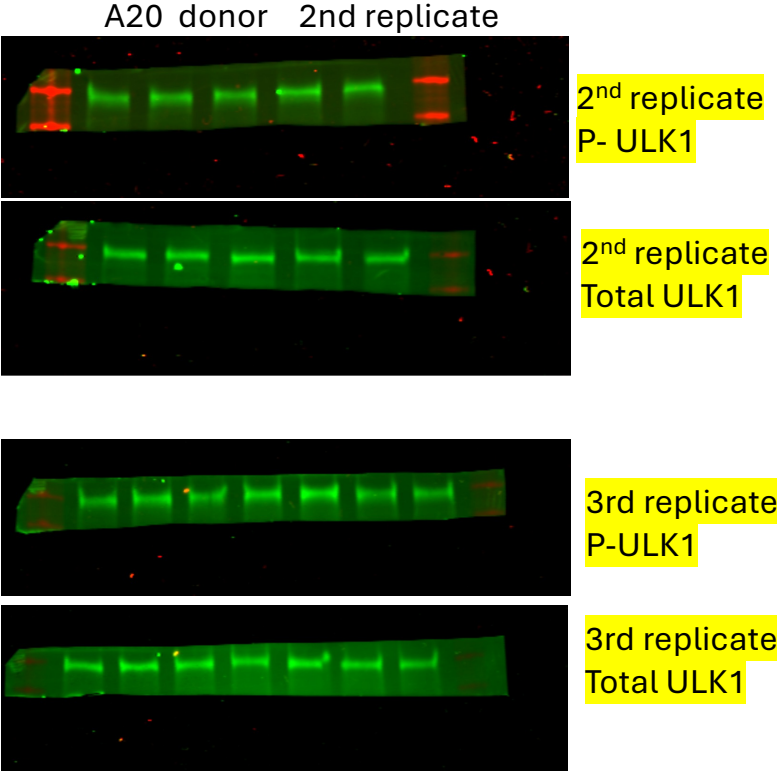

# Figure 3 Phospho and total ULK1 blots

B19 donor

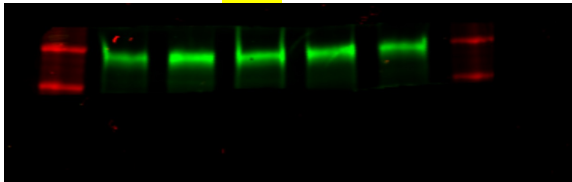

1<sup>st</sup> replicate  
P-ULK1

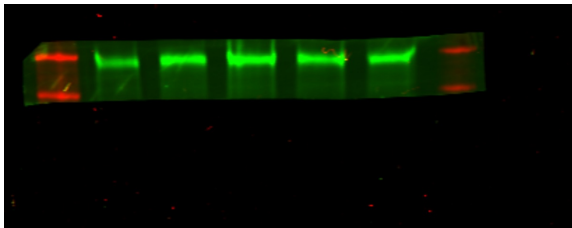

1<sup>st</sup> replicate  
Total-ULK1

B19 donor

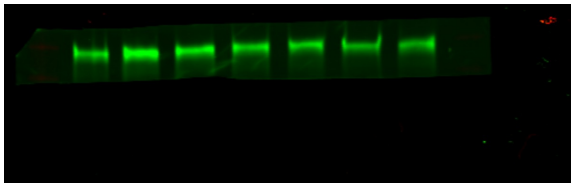

2<sup>nd</sup> replicate  
P-ULK1

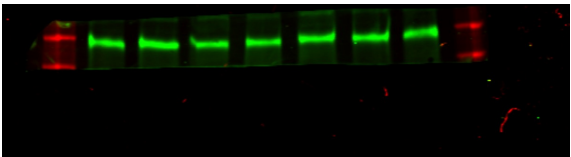

2<sup>nd</sup> replicate  
total-ULK1

# Figure 3 Phospho ULK1 blots

C19 donor

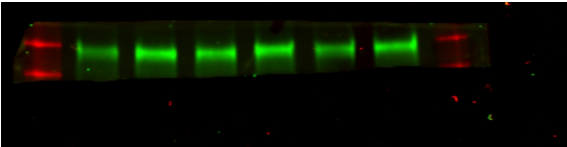

1<sup>st</sup> replicate  
P-ULK

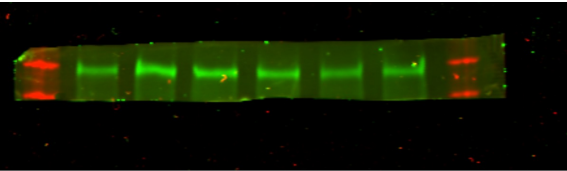

2nd replicate  
total-ULK

C19 donor

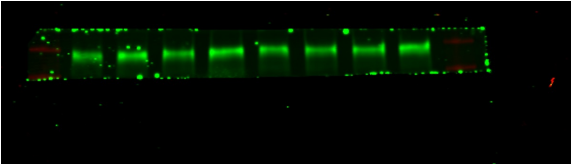

2nd replicate  
P-ULK1

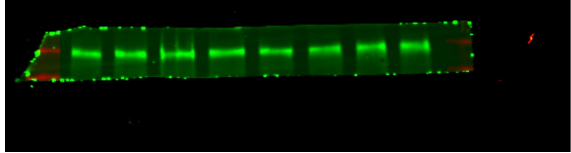

2nd replicate  
total-ULK1

# Figure 4 blots SQSTM1

A17 and A19 donors

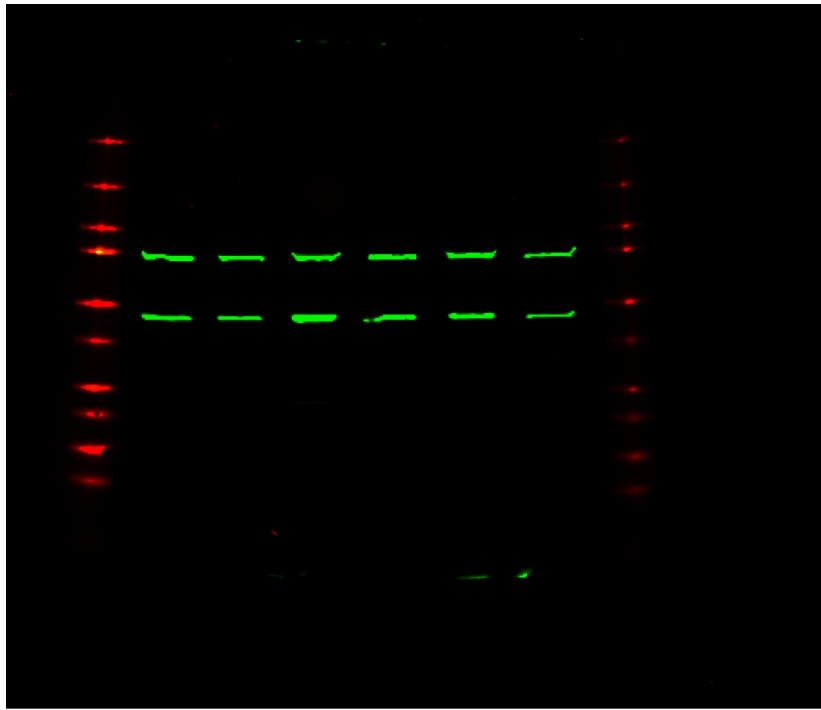

A17 and C22 donors

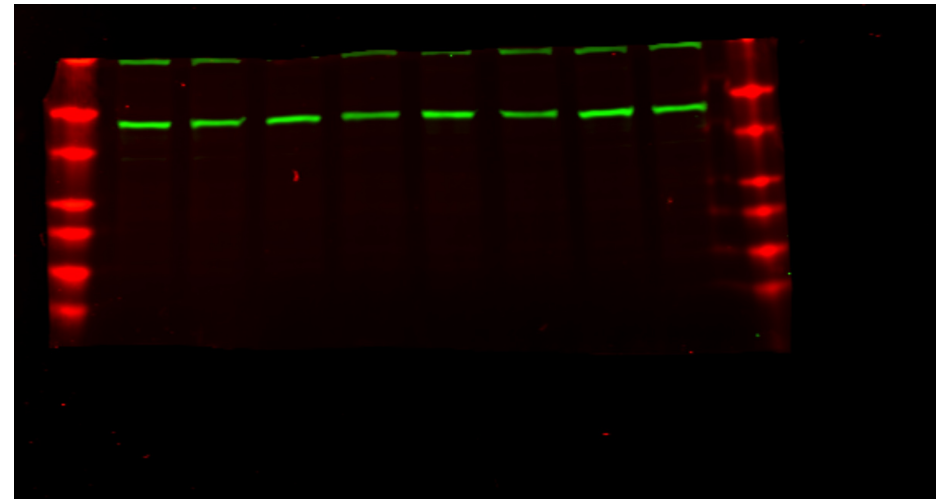

# Figure 4 blots total and phosphor Rib S6

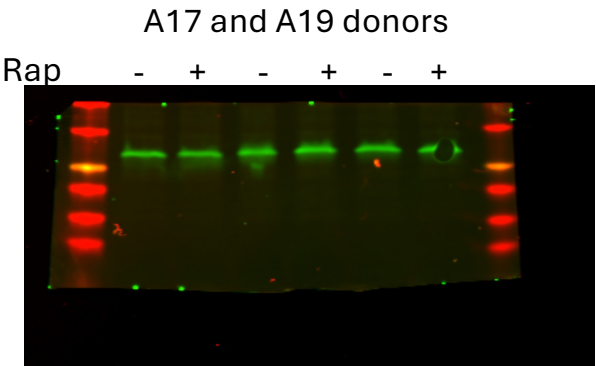

Total RPS6

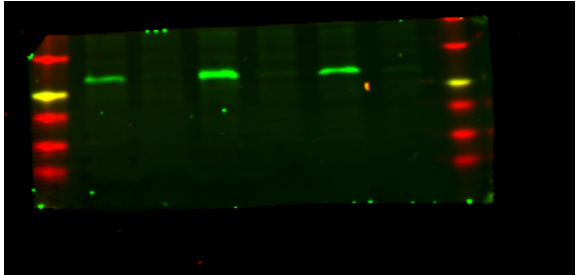

Phospho RPS6

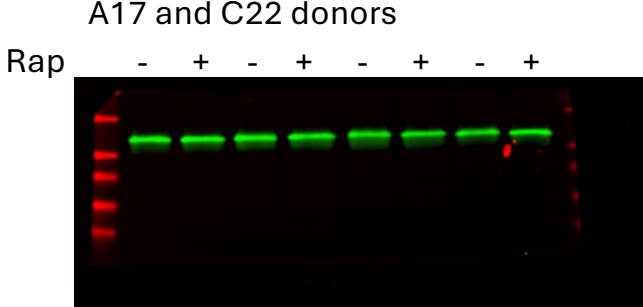

Total RPS6

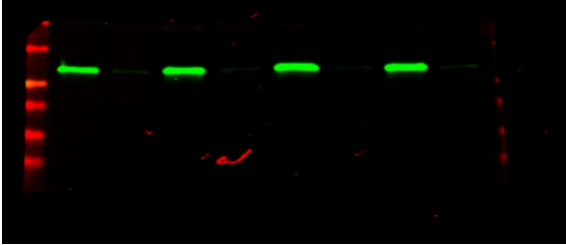

Phospho RPS6

# Figure 4A blots total and phospho PS6K1

A17 and A19 donors

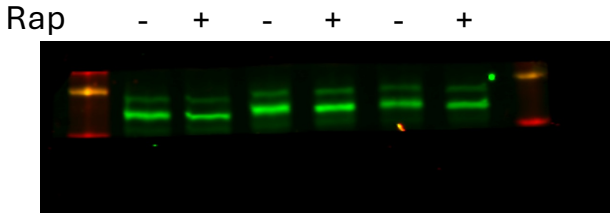

Total S6K1

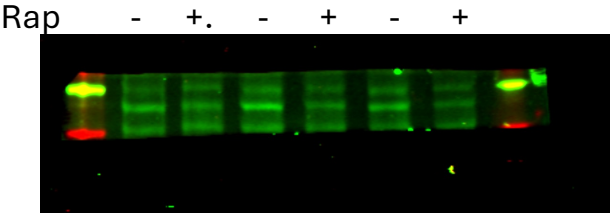

Phospho S6K1

A17 and C22 donors

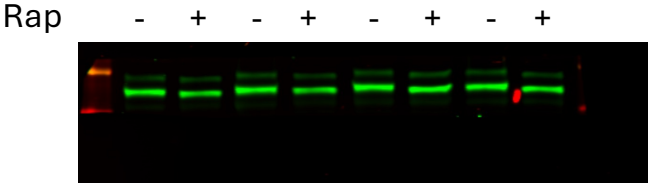

Total S6K1

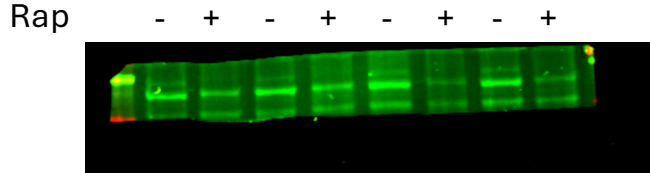

Phospho S6K1

# Figure 5 MUC5AC blots

C22 and A17 donors

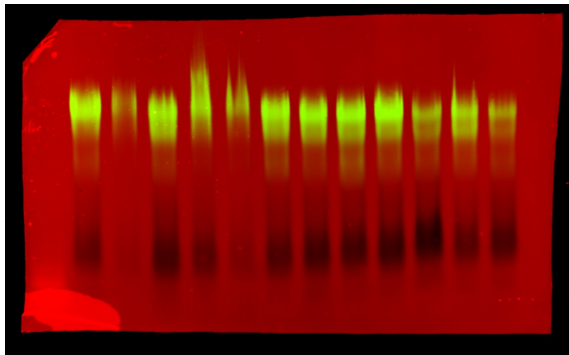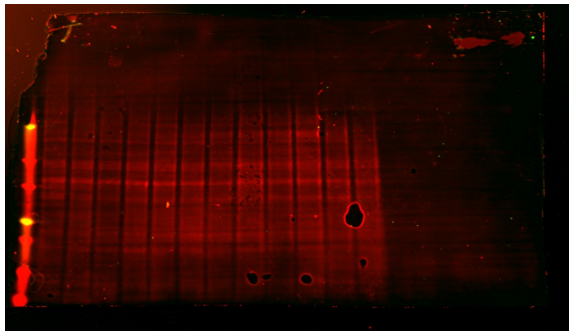

Total protein

A19 donor

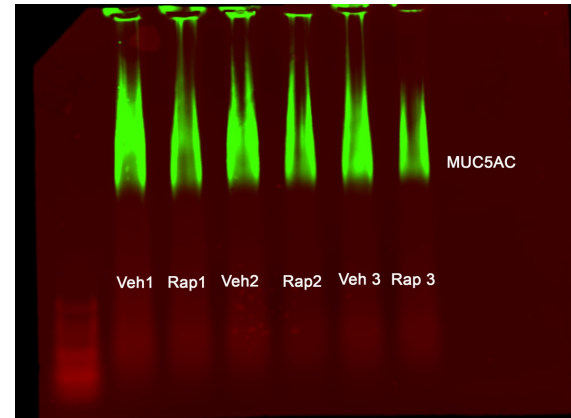

Veh1 Rap1 Veh2 Rap2 Veh 3 Rap 3

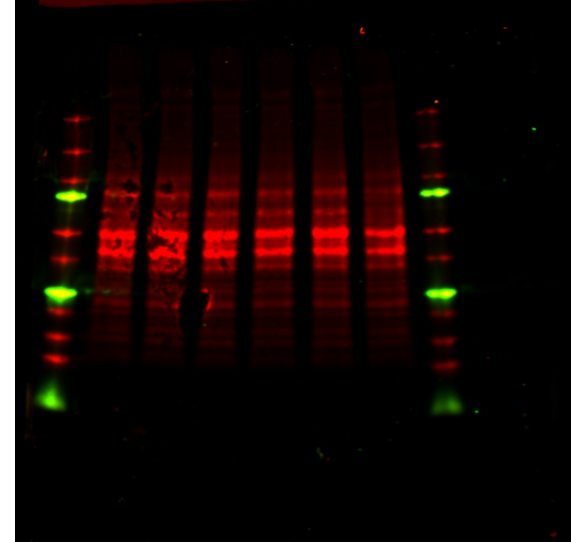

Total protein

## Blots for Figure 8

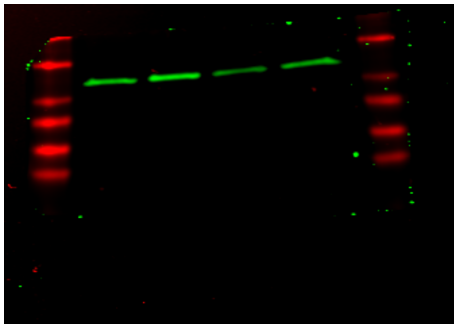

Phospho RPS6

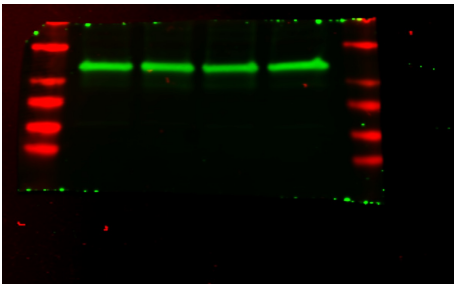

total RPS6

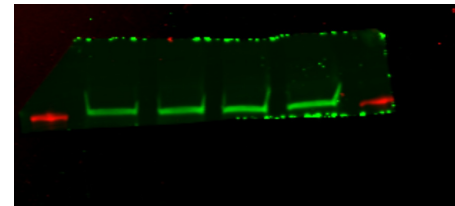

total mTOR
